# Supplementary material
Source: publisher figshare collection journal article supplement (https://karger.figshare.com/ndownloader/files/37510525)
Supplement: Supplementary file 1 [file 37510525]

| Variable | Cases  n(%)* | Controls  n(%)* | Total  n(%)* | Odds ratio | Adjusted Odds ratio | | p value** |
| --- | --- | --- | --- | --- | --- | --- | --- |
| Age of eruption of first milk tooth | | | | | | | |
| 0-6 months | 41(13.6) | 20(6.2) | 61(9.7) | 1.0 | 1.0 | 0.16 | |
| 7 – 10 months | 211(69.9) | 235(72.3) | 446(71.3) | 0.80(0.50-1.27) | 0.78  (0.4-1.25) |
| > 11 months | 50(16.6) | 70(21.5) | 120(19.1) | 0.72(0.51-1.01) | 0.72  (0.51-1.03) |
| Age of first sugar intake | | | | | | | |
| 0 – 6 months | 63(20.9) | 98(30.2) | 161(25.7) | 1.0 | 1.0 | 0.42 | |
| 7 -12 months | 158(52.3) | 150(46.2) | 308(49.1) | 1.06(0.74-1.51) | 0.97  (0.67-1.40) |
| > 13 months | 81(26.8) | 77(23.7) | 158(25.2) | 0.80(0.52-1.23) | 0.66  (0.42-1.04) |
| Intake of solids during sleep | | | | | | | |
| Absent | 274(90.7) | 320(98.5) | 594(94.7) | 1.0 | 1.0 | 0.001 | |
| Present | 28(9.3) | 5(1.5) | 33(5.3) | 6.5(2.5-17.1) | 6.02  (2.2-15.8) |

**Supplementary file 2**: Tooth and Diet Construct

**Abbreviations used in this table: n(%) – Frequency (percentage)*

***p=0.001, indicating statistically significant association between intake of solids during sleep and ECC; significance was set at p<0.05 using multiple logistic regression, whereas age, gender and socio-economic status were adjusted as covariates*
